# Supplementary material
Source: PubMed Central journal article supplement (PMC1783142)

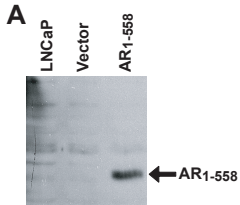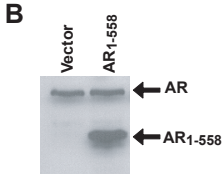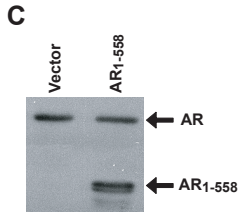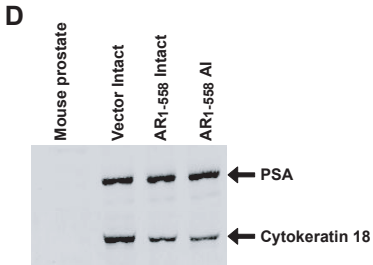

Supplement: pnas_0606718104_1.pdf [file pnas_0606718104_1.pdf]

H & E

Vector

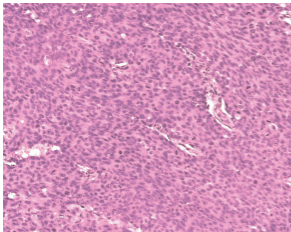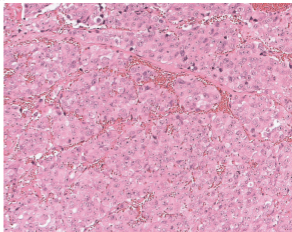

AR<sub>1-558</sub>

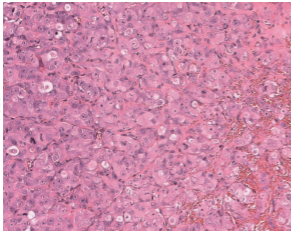

Intact

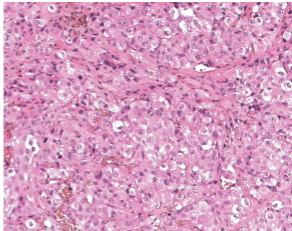

Castrated

Supplement: pnas_0606718104_2.pdf [file pnas_0606718104_2.pdf]

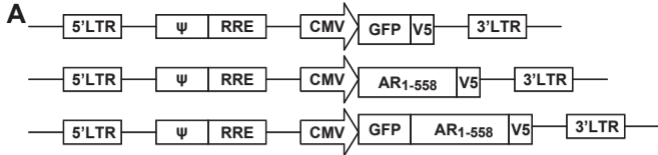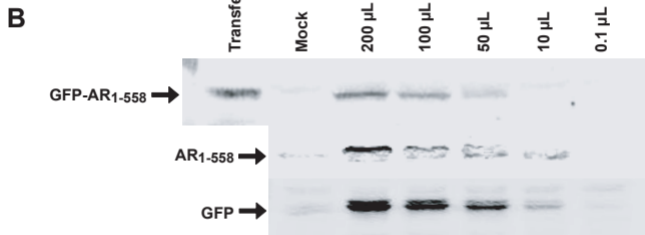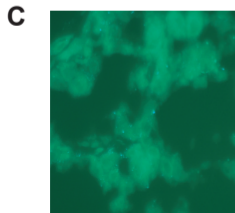

Supplement: pnas_0606718104_3.pdf [file pnas_0606718104_3.pdf]

**A**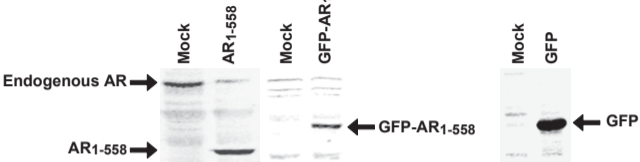**B**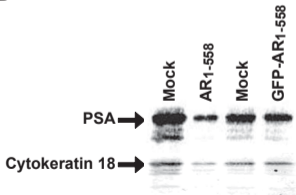**C**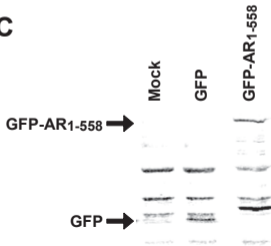

Supplement: pnas_0606718104_4.pdf [file pnas_0606718104_4.pdf]

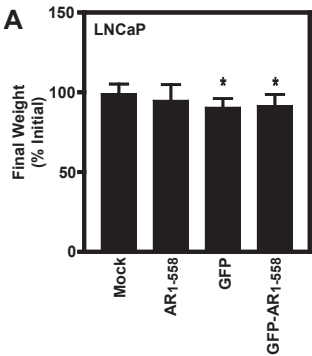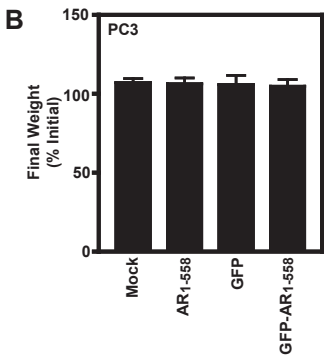

Supplement: pnas_0606718104_5.pdf [file pnas_0606718104_5.pdf]
